# Supplementary material for: Protective Mechanism of Polygonum perfoliatum L. Extract on Chronic Alcoholic Liver Injury Based on UHPLC-QExactive Plus Mass Spectrometry Lipidomics and MALDI-TOF/TOF Mass Spectrometry Imaging
Source: MDPI journal article supplement (doi:10.3390/foods11111583), 2022-05-28
Supplement: s1 [file s1]

## Supplementary information

Protective mechanism of *Polygonum perfoliatum* L. extract on chronic alcoholic liver injury based on UHPLC-QExactive Plus mass spectrometry lipidomics and MALDI-TOF/TOF mass spectrum imaging

Huaguo Chen <sup>1,2</sup>, Lei Peng <sup>1,2</sup>, Chao Zhao<sup>1,2</sup>, Zongwei Cai <sup>3,\*</sup>, Xin Zhou <sup>1,2,\*</sup>

1. Key Laboratory for Information System of Mountainous Areas and Protection of Ecological Environment, Guizhou Normal University, Guiyang 550001, China;
2. Guizhou Engineering Laboratory for Quality Control & Evaluation Technology of Medicine, Guizhou Normal University, Guiyang 550001, China.
3. State Key Laboratory of Environmental and Biological Analysis, Department of Chemistry, Hong Kong Baptist University, Hong Kong SAR, China

### Corresponding author

**Xin Zhou:** Guizhou Normal University, 116 Baoshan North Rd., Guiyang, 550001, China, \*Tel.: +86-851-8669-0018; Fax: +86-851-8669-0018

E-mail address: [alice9800@sina.com](mailto:alice9800@sina.com)

**Zongwei Cai:** Hong Kong Baptist University, Hong Kong SAR, China

E-mail address: [zwcai@hkbu.edu.hk](mailto:zwcai@hkbu.edu.hk)

## Contents

|                                                                                                          |   |
|----------------------------------------------------------------------------------------------------------|---|
| Figure S1 Total ion chromatograms (TIC) of compounds detection in <i>P. perfoliatum</i><br>extract ..... | 3 |
| Table S1 Compounds identified by UHPLC-MS in negative ion mode .....                                     | 4 |
| Table S2 MS/MS fragmentation of each identified compound .....                                           | 5 |

Figure S1 Total ion chromatograms (TIC) of compounds detection in *P. perfoliatum* extract

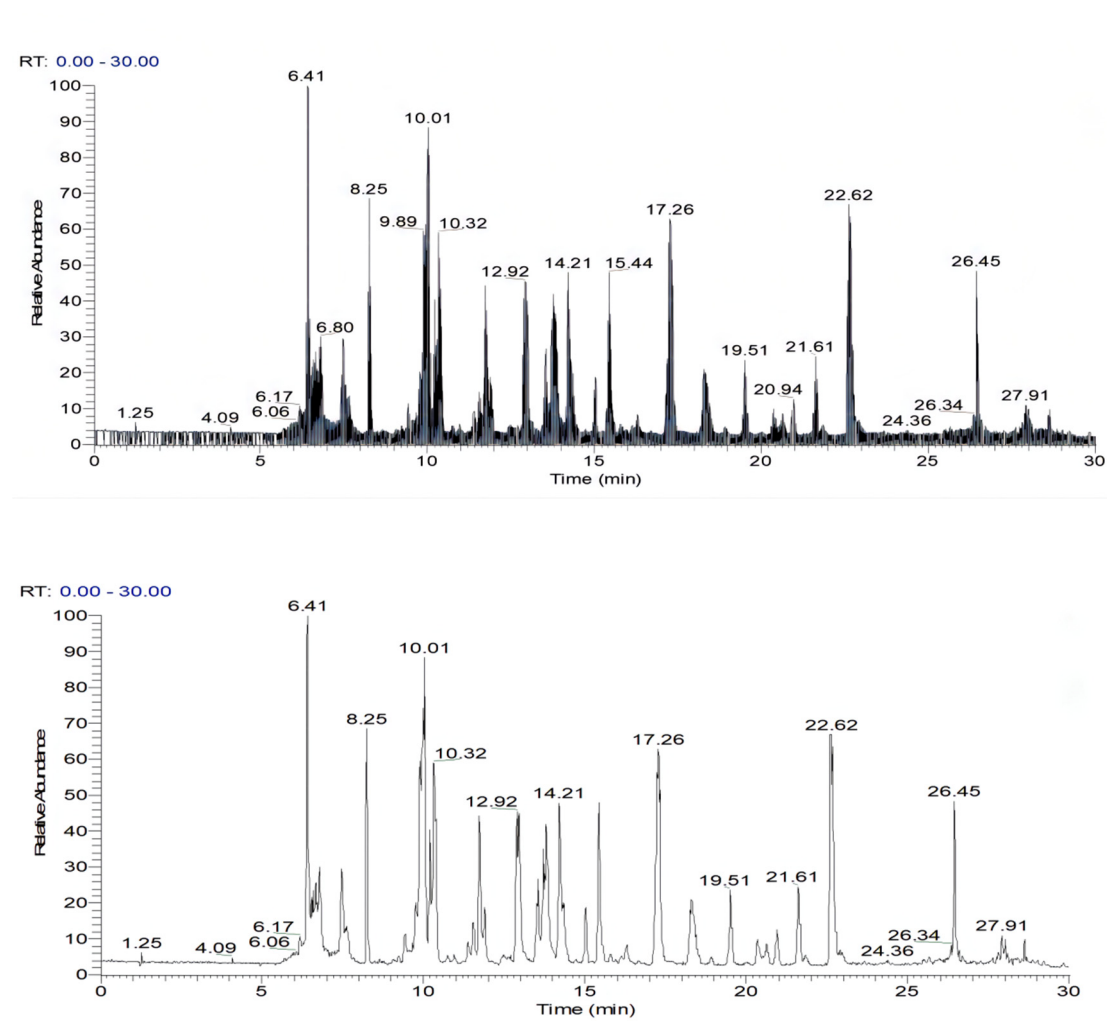

Table S1 Compounds identified by UHPLC-MS in negative ion mode

| No. | t/min | Compound                           | Molecular formula                               | Estimated value (m/z) | Error | Secondary mass spectrometry (m/z)                |
|-----|-------|------------------------------------|-------------------------------------------------|-----------------------|-------|--------------------------------------------------|
| 1   | 6.17  | Gallocatechin                      | C <sub>15</sub> H <sub>14</sub> O <sub>7</sub>  | 305.7069              | 1.98  | 287.1098, 261.0209, 219.3217, 179.0732, 167.1120 |
| 2   | 6.41  | Catechinic acid                    | C <sub>15</sub> H <sub>14</sub> O <sub>6</sub>  | 289.5927              | 4.32  | 245.4611, 203.1266, 179.3412, 151.9015           |
| 3   | 8.25  | Chlorogenic Acid                   | C <sub>16</sub> H <sub>18</sub> O <sub>9</sub>  | 351.1774              | 2.19  | 191.1088                                         |
| 4   | 10.01 | Epicatechin                        | C <sub>15</sub> H <sub>14</sub> O <sub>6</sub>  | 288.7415              | 1.02  | 245.6725, 203.0728, 179.1927, 151.0307           |
| 5   | 10.32 | Sanitol-7-O-rhamnose-3-O-glucoside | C <sub>27</sub> H <sub>30</sub> O <sub>15</sub> | 596.4124              | -0.39 | 284.1092, 285.0802                               |
| 6   | 12.92 | Rutin                              | C <sub>27</sub> H <sub>30</sub> O <sub>16</sub> | 607.1754              | 1.64  | 300.1011, 301.2016                               |
| 7   | 14.21 | Kaempferol-3-O-neocyanin           | C <sub>27</sub> H <sub>30</sub> O <sub>15</sub> | 592.122               | 3.22  | 284.2922, 285.1650                               |
| 8   | 17.26 | Isoquercitrin                      | C <sub>21</sub> H <sub>20</sub> O <sub>12</sub> | 462.9188              | 2.55  | 300.1213, 301.2090                               |
| 9   | 19.51 | Kaempferol rutin                   | C <sub>27</sub> H <sub>30</sub> O <sub>15</sub> | 591.5722              | 4.11  | 284.3731, 285.4232                               |
| 10  | 21.61 | Quercitrin                         | C <sub>21</sub> H <sub>20</sub> O <sub>11</sub> | 448.2144              | 2.68  | 300.2901, 301.2884                               |
| 11  | 22.62 | Quercetin                          | C <sub>15</sub> H <sub>10</sub> O <sub>7</sub>  | 301.9162              | 3.77  | 273.1736, 229.8021, 179.0902, 151.1877           |
| 12  | 26.46 | Kaempferol                         | C <sub>15</sub> H <sub>10</sub> O <sub>6</sub>  | 284.2505              | 2.89  | 255.2334, 227.0519, 181.2976                     |

Table S2 MS/MS fragmentation of each identified compound

| NO. | Metabolite           | Formula                                                         | Measured m/z | MASS<br>accuracy (ppm) | Secondary mass<br>spectrometry (m/z)      |
|-----|----------------------|-----------------------------------------------------------------|--------------|------------------------|-------------------------------------------|
| 1   | Stearoyl-L-Carnitine | C <sub>25</sub> H <sub>49</sub> NO <sub>4</sub>                 | 426.3421     | -2.03                  | 85.0100, 60.0182,<br>84.0147, 86.0118     |
| 2   | 6-Aminohexanoate     | C <sub>6</sub> H <sub>12</sub> NO <sub>2</sub>                  | 131.3162     | -0.79                  | 115.0772, 114.0931,<br>97.0673, 69.0712   |
| 3   | Linoleic acid        | C <sub>18</sub> H <sub>32</sub> O <sub>2</sub>                  | 280.3325     | -0.91                  | 264.2402, 245.2264,<br>97.1009            |
| 4   | PC(16:0/18:1)        | C <sub>42</sub> H <sub>82</sub> NO <sub>8</sub> P               | 703.4683     | 1.49                   | 506.4024, 406.1626,<br>281.1215, 224.0020 |
| 5   | LPE(20:3)            | C <sub>25</sub> H <sub>46</sub> NO <sub>7</sub> P               | 503.3612     | -0.95                  | 440.2333, 214.0486,<br>152.9958, 78.9591  |
| 6   | Bexarotene           | C <sub>24</sub> H <sub>28</sub> O <sub>2</sub>                  | 348.5070     | -0.71                  | 279.1367, 251.1056,<br>227.1778           |
| 7   | Ginkgolide B         | C <sub>20</sub> H <sub>24</sub> O <sub>10</sub>                 | 424.4803     | 1.35                   | 368.1410, 367.1388,<br>125.0237, 113.0234 |
| 8   | Abietic acid         | C <sub>20</sub> H <sub>30</sub> O <sub>2</sub>                  | 302.2624     | -0.97                  | 257.2265, 149.1325,<br>123.1169, 121.1012 |
| 9   | SM(d18:1/18:0)       | C <sub>41</sub> H <sub>83</sub> N <sub>2</sub> O <sub>6</sub> P | 730.5561     | -1.06                  | 184.0749, 104.1077,<br>86.0971            |
| 10  | SM(d18:0/16:0)       | C <sub>39</sub> H <sub>81</sub> N <sub>2</sub> O <sub>6</sub> P | 704.4763     | -0.11                  | 619.4890, 464.3328,<br>239.2369, 74.0964  |
